# Supplementary material
Source: PubMed Central journal article supplement (PMC9787186)
Supplement: NIHMS1514954-supplement-1.pdf [file NIHMS1514954-supplement-1.pdf]

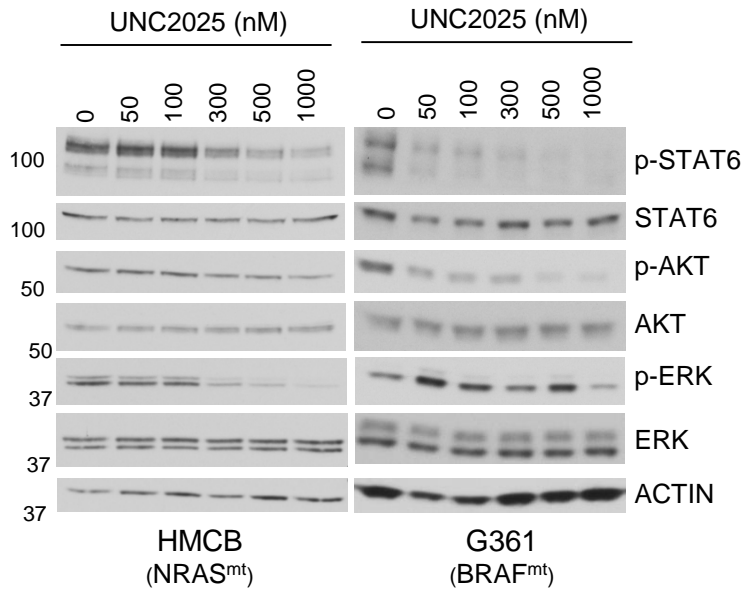

**Supplemental Figure 1: UNC2025 inhibits downstream signaling in melanoma cell lines under normal growth conditions.** Cultures of the indicated cell lines were treated with UNC2025 for 90 minutes. Cell lysates were prepared and the indicated phosphorylated (denoted by p-) and total proteins were detected by immunoblot. ACTIN is shown as a loading control.
