# Supplementary material
Source: PubMed Central journal article supplement (PMC9787186)
Supplement: NIHMS1514954-supplement-2.pdf [file NIHMS1514954-supplement-2.pdf]

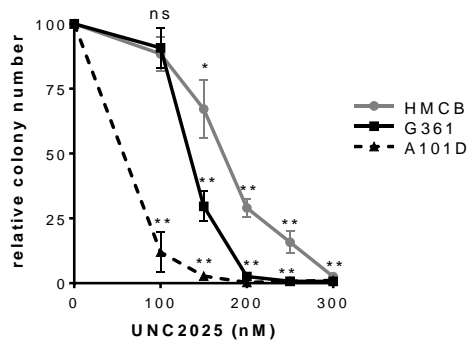

**Supplemental figure 2: UNC2025 reduces colony forming potential in melanoma cell lines.** Melanoma cell lines were cultured at low density and treated with UNC2025 for 10 days, then colonies were stained with crystal violet and enumerated. Mean colony numbers and standard errors in HM CB, G361 and A101D cell lines relative to cultures treated with vehicle (0 = DMSO) are shown. n = 3, ns = not significant, \* p < 0.01 versus vehicle, \*\* p < 0.0001 versus vehicle, one-way ANOVA.
