# Supplementary material
Source: PubMed Central journal article supplement (PMC9787186)
Supplement: NIHMS1514954-supplement-3.pdf [file NIHMS1514954-supplement-3.pdf]

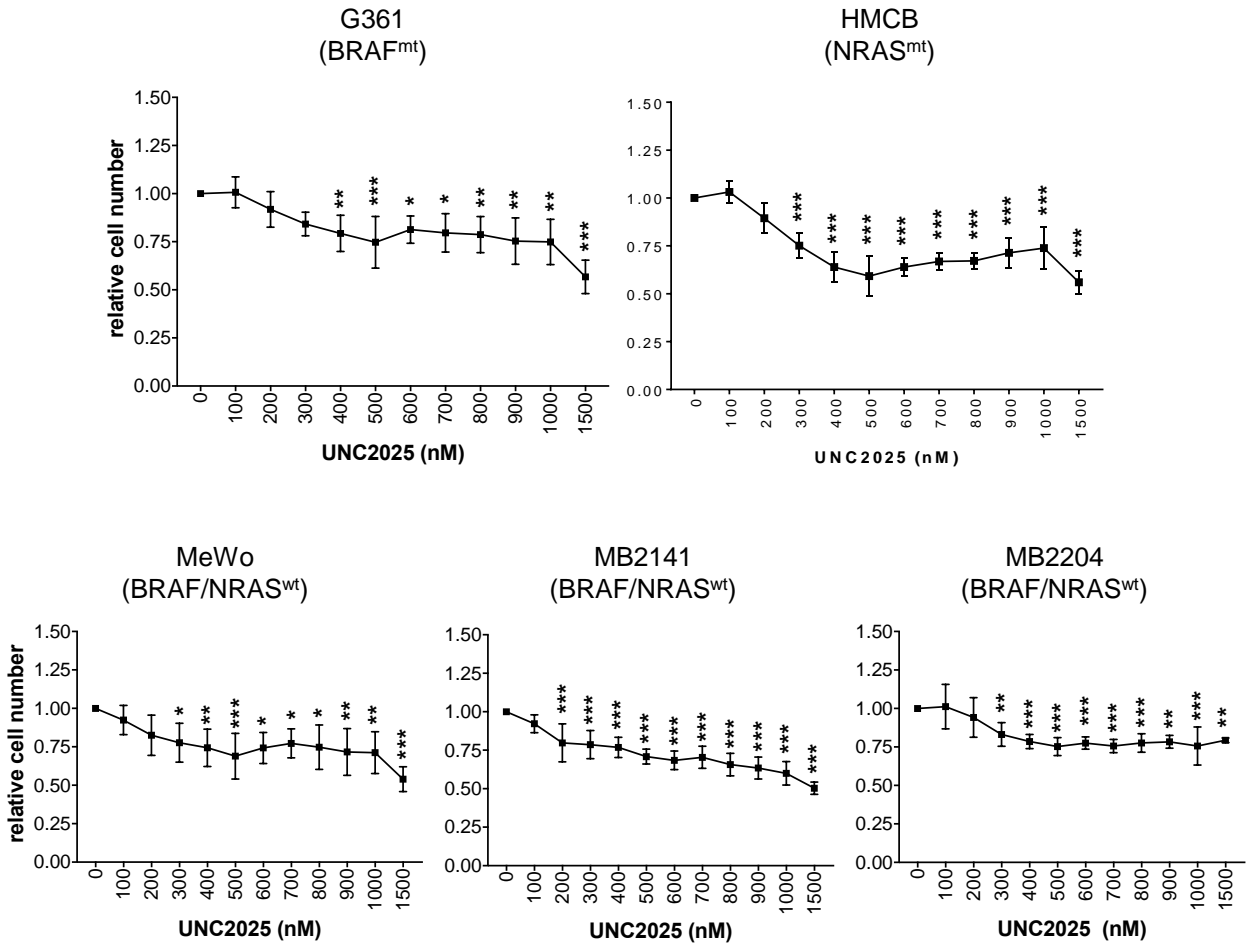

**Supplemental figure 3: UNC225 inhibits cell density in melanoma cell lines irrespective of driver oncogene status.** Cultures of the indicated cell lines were treated with UNC225 or vehicle (DMSO). After 44 hours, MTT reagent was added to cultures for an additional 4 hours then solubilization solution was added and cultured overnight. Absorbance was determined as an indicator of viable cells and normalized to the vehicle-treated controls. Mean values and standard errors were derived from 4-6 independent experiments. \* $p < 0.05$ , \*\* $p < 0.01$ , and \*\*\* $p < 0.001$ , by one-way ANOVA.
