# Supplementary material
Source: PubMed Central journal article supplement (PMC9787186)
Supplement: NIHMS1514954-supplement-4.pdf [file NIHMS1514954-supplement-4.pdf]

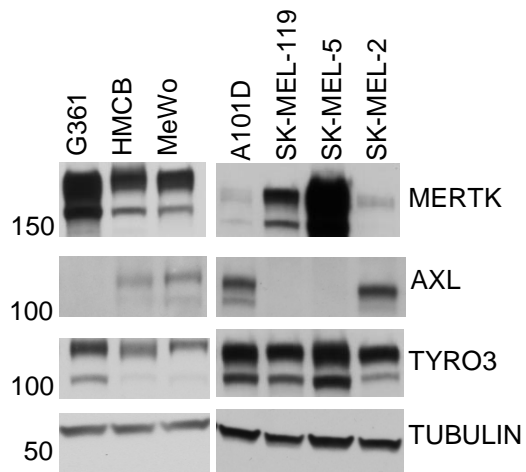

**Supplemental figure 4: TAM-family kinase expression in melanoma cell lines.** Cell lysates were prepared from cultures of the indicated melanoma cell lines and MERTK, AXL and TYRO3 were detected by immunoblot. TUBULIN is shown as a loading control.
