# Supplementary material
Source: PubMed Central journal article supplement (PMC9787186)
Supplement: NIHMS1514954-supplement-5.pdf [file NIHMS1514954-supplement-5.pdf]

**A**

UNC2025

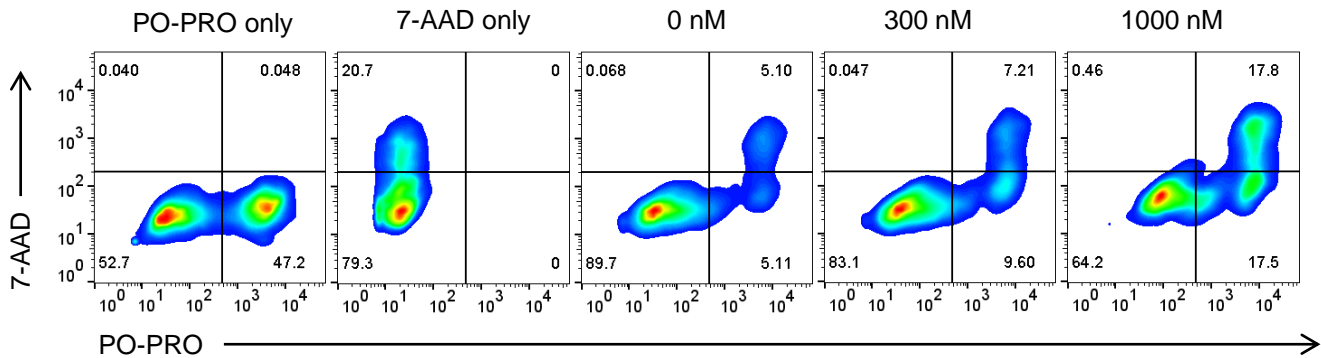**B**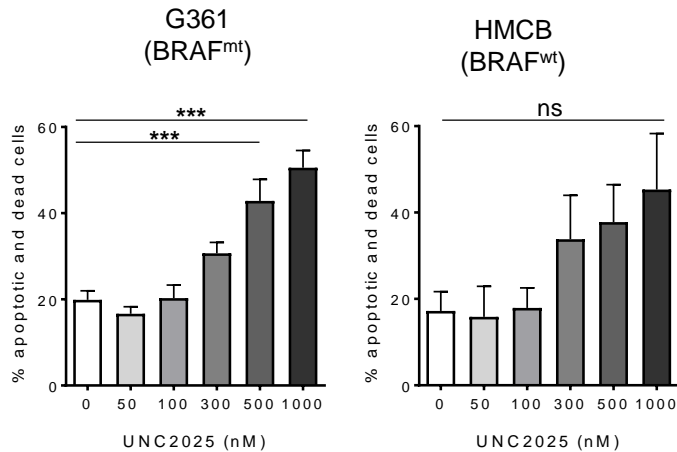

**Supplemental Figure 5: Inhibition of MERTK induces cell death in melanoma cell lines.** G361 and HMCB melanoma cell cultures were treated with UNC2025 for 48 h and then stained with PO-PRO™-1 iodide (PO-PRO) and 7-AAD. Apoptotic (PO-PRO+, 7-AAD negative) and dead (7-AAD+) cells were detected by flow cytometry. A) Representative histograms derived from G361 cultures treated with DMSO vehicle or the indicated concentrations of UNC2025. B) Mean values and standard errors derived from 4-6 independent experiments. \*\*\*  $p < 0.001$ , ns = not significant, one-way ANOVA.
