# Supplementary material
Source: PubMed Central journal article supplement (PMC9787186)
Supplement: NIHMS1514954-supplement-6.pdf [file NIHMS1514954-supplement-6.pdf]

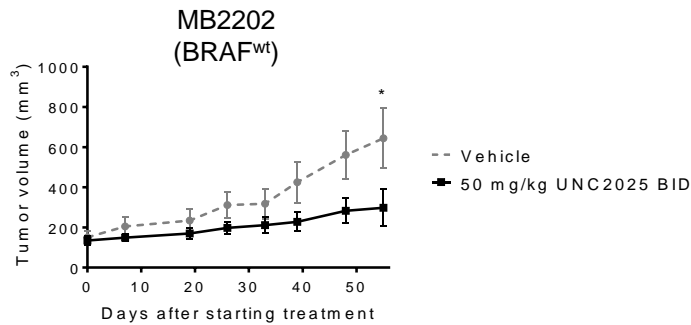

**Supplemental Figure 6: Treatment with UNC2025 inhibits tumor growth in a BRAF<sup>wt</sup> patient-derived melanoma xenograft.** A xenograft-passaged BRAF<sup>wt</sup> patient sample (MB2202) was transplanted into nude mice and mice with established tumors were treated twice daily (BID) with 50 mg/kg UNC2025 or an equivalent volume of vehicle. Tumor volumes were measured at intervals. n=4-5, \*p<0.05 two-way ANOVA.
