# Supplementary material
Source: PubMed Central journal article supplement (PMC9787186)
Supplement: NIHMS1514954-supplement-7.pdf [file NIHMS1514954-supplement-7.pdf]

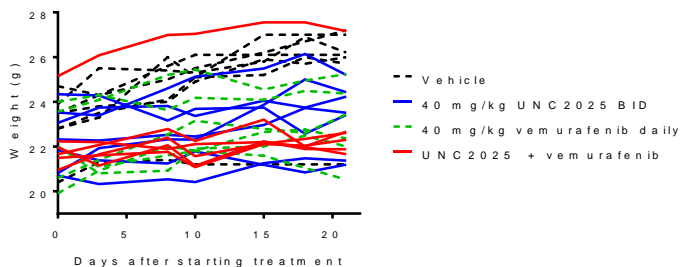

**Supplemental Figure 7: Treatment with UNC2025 and vemurafenib does not adversely impact mouse weight.** Tumor bearing mice were treated twice daily (BID) with 40 mg/kg UNC205, once daily with 40 mg/kg vemurafenib, equivalent doses of UNC2025 and vemurafenib, or an equivalent volume of vehicle. Mouse weights were measured at intervals and weights of individual mice are shown.
